# Supplementary material for: Salmonella enterotoxin (Stn) regulates membrane composition and integrity
Source: PubMed Central journal article supplement — Dis Model Mech. 2012 Feb 2;5(4):515–21. doi: 10.1242/dmm.009324 (PMC3380714; doi:10.1242/dmm.009324), 2012-02-02
Supplement: supp_009324_DMM009324FigS1.pdf [file supp_009324_DMM009324FigS1.pdf]

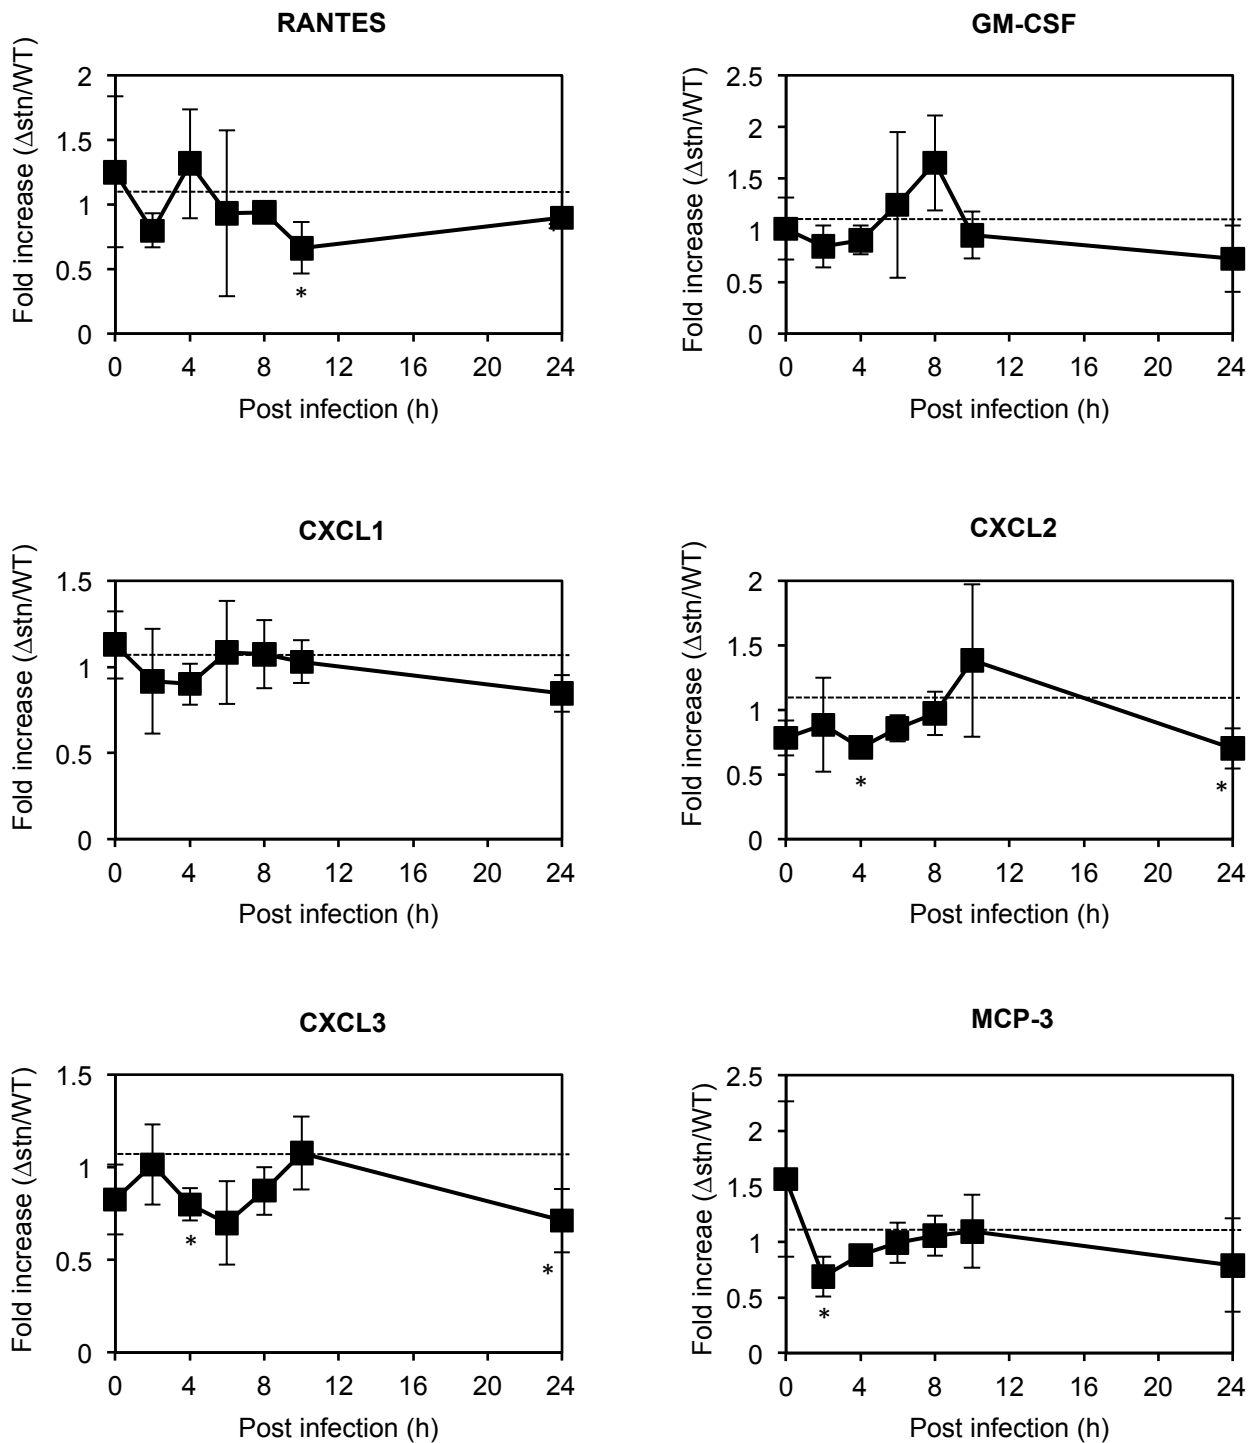

**Figure S1. Quantification of chemokine mRNA levels by real-time PCR.** RNA was isolated from infected HeLa cells (MOI = 10). Fold change in the mRNA levels from infected HeLa cells in the  $\Delta$ stn versus the parent strain, was measured by quantitative real-time PCR. Each mRNA level was normalized to GAPDH mRNA levels. Data are expressed as means  $\pm$  s.d.s of three independent experiments. \*,  $p < 0.05$ .
